# Supplementary material for: Post-transcriptional Control of Tumor Cell Autonomous Metastatic Potential by CCR4-NOT Deadenylase CNOT7
Source: PLoS Genet. 2016 Jan 25;12(1):e1005820. doi: 10.1371/journal.pgen.1005820 (PMC4726497; doi:10.1371/journal.pgen.1005820)
Supplement: S3 Table — (XLSX) [file pgen.1005820.s008.xlsx]

## Sheet: Table S3 - Tripartite motif RIP
Mouse Gene Symbol	weights		Human Gene Symbol	Present in GOBO?
Parp4	1		PARP4	TRUE
D430041D05Rik	1		KIAA1549L	FALSE
Nhsl1	1		NHSL1	FALSE
Oxr1	1		OXR1	TRUE
Rqcd1	1		RQCD1	TRUE
Nfyc	1		NFYC	TRUE
Gmcl1	1		GMCL1	TRUE
Ccdc85a	1		CCDC85A	FALSE
Plcxd2	1		PLCXD2	FALSE
1700016D06Rik	1			FALSE
Polq	1		POLQ	TRUE
Qtrtd1	1		QTRTD1	TRUE
Zfp462	1		ZFP462	FALSE
Ftsj1	1		FTSJ1	TRUE
Rassf4	1		RASSF4	TRUE
Klhl5	1		KLHL5	FALSE
Sorbs2	1		SORBS2	TRUE
Hhla1	1		HHLA1	TRUE
Atp2b1	1		ATP2B1	TRUE
Gria4	1		GRIA4	TRUE
Ppp1r12b	1		PPP1R12B	TRUE
Kcnj15	1		KCNJ15	TRUE
Prr5l	1		PRR5L	TRUE
Tango6	1		TANGO6	FALSE
Lrp11	1		LRP11	FALSE
Tctex1d2	1		TCTEX1D2	FALSE
Tmcc3	1		TMCC3	FALSE
Car12	1		CAR12	FALSE
Fli1	1		FLI1	TRUE
Eps8	1		EPS8	TRUE
Psmb1	1		PSMB1	TRUE
Polr1e	1		POLR1E	TRUE
Robo2	1		ROBO2	FALSE
Nin	1		NIN	TRUE
Tmem170b	1		TMEM170B	FALSE
Arhgap31	1		ARHGAP31	FALSE
Aak1	1		AAK1	TRUE
Glud1	1		GLUD1	TRUE
Sh3pxd2b	1		SH3PXD2B	FALSE
Ppfibp1	1		PPFIBP1	TRUE
Wdfy3	1		WDFY3	TRUE
Ehd4	1		EHD4	TRUE
Fnip1	1		FNIP1	FALSE
Cdc42ep1	1		CDC42EP1	TRUE
Pxn	1		PXN	TRUE
Mrvi1	1		MRVI1	FALSE
Hip1	1		HIP1	TRUE
Pon3	1		PON3	TRUE
Pak3	1		PAK3	TRUE
Stat5b	1		STAT5B	TRUE
Prkcd	1		PRKCD	TRUE
Brinp3	1		BRINP3	FALSE
Nfatc2	1		NFATC2	FALSE
4930402H24Rik	1		C20orf194	FALSE
Lphn2	1		LPHN2	TRUE
Grik3	1		GRIK3	TRUE
Nub1	1		NUB1	FALSE
Mitf	1		MITF	TRUE
Nr2f2	1		NR2F2	TRUE
Elavl1	1		ELAVL1	TRUE
Pawr	1		PAWR	TRUE
Acsl6	1		ACSL6	TRUE
Tenm2	1		TENM2	FALSE
Cep170b	1		CEP170B	FALSE
Cdca7l	1		CDCA7L	FALSE
Ppp2r5e	1		PPP2R5E	TRUE
Rnf19a	1		RNF19A	TRUE
Usp25	1		USP25	TRUE
Arhgap12	1		ARHGAP12	TRUE
Psmd11	1		PSMD11	TRUE
Fzd2	1		FZD2	TRUE
