# Supplementary material for: Post-transcriptional Control of Tumor Cell Autonomous Metastatic Potential by CCR4-NOT Deadenylase CNOT7
Source: PLoS Genet. 2016 Jan 25;12(1):e1005820. doi: 10.1371/journal.pgen.1005820 (PMC4726497; doi:10.1371/journal.pgen.1005820)
Supplement: S4 Table — (XLSX) [file pgen.1005820.s009.xlsx]

## Sheet: Table S5 - Tripartite motif AND
Genes with Tripartite motifs and inversely associated with CNOT7
Stat2
Farp1
Pi15
Pag1
Myo5b
Gramd3
Il13ra1
Cdc23
Slc38a6
Comtd1
Gtf3c4
Stx6
Hs6st1
Dusp3
Stom
Herc3
Pfkfb2
Sidt2
Sgpp1
Crb3
Slc43a2
Depdc7
Parp14
Suds3
Timm23
Msl1
Tomm22
Frmd4b
Ppp1r2
Prkch
Atg16l1
Itgb6
Abtb2
Ccdc120
Pex1
Golga2
Chn2
Nhp2l1
Scn8a
Tgfb2
Ptpn3
Nck2
Wbp5
Tmod3
Galnt13
Atp10d
Lmbrd1
Cpne8
Rfwd2
Uap1
Med28
Immp1l
Slc4a4
Slc39a14
Litaf
F11r
Agrn
Robo1
Arhgap26
Ebag9
Arfgef1
Acsl3
Mgat5
C2cd2
Pphln1
Stk35
Phldb2
Slc7a1
Lima1
Elf1
Ube2e2
Rassf5
Ccny
Nmnat2
Tspan9
Ammecr1l
Slain2
Ptcd1
Ctsb
Asb8
Cd44
Slc25a17
Prkcd
Tlr3
Zfp503
Vdac2
B4galt3
Rnf128
Abcb7
Parp9
H3f3a
Sap18
Mex3c
Rock2
Itga1
Stab1
Lhfpl2
Ube2l3
Me3
Lamc2
Ovol1
Gtf2f2
Lamp1
Cenpo
Dlg5
Cdh10
Med24
Gjb3
Rapgef1
Cd160
Smg7
Slc37a1
Srgap2
Setd8
Lama3
App
Pomt2
Foxj2
Entpd5
Mrpl35
Arap2
Csmd3
Diap1
Plcb3
Ube2h
Rpl15
Tgfbrap1
Sugt1
Fndc7
Dr1
Pfkfb3
Stk24
Tnfrsf10b
Nab1
Mrpl1
Vav2
Ccdc116
Mospd2
Kcnab1
Pik3cb
Senp1
Gpa33
Senp2
Hdac8
Adam12
Dis3l2
Ltbp2
Mmp2
Ets2
Tmem183a
Kcnh1
Myo10
Slc25a25
Fbxl3
Tkt
Trim6
Ptpn13
Exosc4
Stt3b
Tbc1d23
Tomm20
Acin1
Znhit3
Acpp
Riok3
Ppm1h
Stk17b
Cln6
Macrod2
Fam167a
Ubac2
Dph3
Tmbim1
Twistnb
Dock5
Tpd52l1
Tmtc2
Ctsc
Dennd1b
Lrch1
Itsn1
Megf10
Ndfip2
Luzp1
Slc18a1
Klf9
Tmed1
Elmo1
Mitd1
Zbtb2
Zfp11
Fgd3
Hmcn1
Trabd
Grhl2
Wbp4
Cpox
Tsfm
Esrp1
Golga7b
Mnat1
Dennd4a
Slc16a4
Wdr26
Rreb1
Asb2
Rapgef5
Ptrf
Oxsm
Slc29a1
Pgam5
Aff1
Xpr1
Kank1
Mctp2
Dcaf8
Pxk
Ddx39
Anxa1
Tm4sf5
Csnk1e
Abcc4
Arl8a
Btg3
Kcnk5
Stat3
Pawr
Akap7
Smurf1
Pbx1
Fam107b
Ddx19b
Ehf
Nvl
Ikbkb
Ppp2r5a
Cacna2d4
Tnik
Spc24
Iars2
Smpdl3b
Rnf19a
Denr
Ntn1
Ehd4
Cspp1
Slc23a2
Rbm7
Micall1
Btf3
Dnmt3a
Psma4
Zbtb7a
Spcs1
N4bp1
Idh3a
Dhx32
Zfp106
Arf4
Nanos1
Aip
Tnrc6b
Nit2
Numb
Egfr
Derl1
Ldlrad3
Jam2
Txnip
Rnf150
Galnt2
Ccdc38
Zbtb44
Snw1
N4bp2l1
Sypl
Dhodh
Fyttd1
Kdm5c
Abhd13
Sned1
Unc13c
Foxc1
Mlec
Dusp11
Srd5a3
St7
Irf2
Dip2b
Dcps
Chac2
Lnx1
Slc1a1
