# Supplementary material for: Post-transcriptional Control of Tumor Cell Autonomous Metastatic Potential by CCR4-NOT Deadenylase CNOT7
Source: PLoS Genet. 2016 Jan 25;12(1):e1005820. doi: 10.1371/journal.pgen.1005820 (PMC4726497; doi:10.1371/journal.pgen.1005820)
Supplement: S5 Table — (XLS) [file pgen.1005820.s010.xls]

## Sheet: Sheet1
Canonical Pathways	p-value	overlap
Leukocyte Extravasation Signaling	0.000106	5.6% (11/198)
HER-2 Signaling in Breast Cancer	0.000657	7.9% (6/76)
HGF Signaling	0.000658	6.7% (7/105)
UVB-Induced MAPK Signaling	0.000827	9.4% (5/53)
Virus Entry Via Endocytic Pathways	0.0015	6.7% (6/89)
Upstream Regulators	p-value of overlap	# molecules
KRAS	3.27e-05	5.1% (15/293)
ERBB2	8.23e-05	7.2% (21/293)
LMNA	8.89e-05	3.7% (11/293)
LAMC	0.000163	0.6% (2/293)
TGFB1	0.000216	12.9% (38/293)
Top Diseases and Biological Functions	p-value range	# molecules
Cancer	1.39E-02 - 4.95E-06	247
Organismal Injury and Abnormalities	1.39E-02 - 4.95E-06	251
Reproductive System Disease	1.39E-02 - 5.12E-05	134
Gastrointestinal Disease	1.39E-02 - 6.66E-05	183
Hepatic Systemd Disease	1.39E-02 - 6.66E-05	120
Kras Regulated Genes	Gene/Probe ID	GOBO matched
Tnfrsf10b	TNFRSF10A	FALSE
Stom	STOM	TRUE
Stat3	STAT3	TRUE
Stat2	STAT2	TRUE
Rbm7	RBM7	TRUE
Prkcd	PRKCD	TRUE
Pawr	PAWR	TRUE
Nab1	NAB1	TRUE
Mmp2	MMP2	TRUE
Lamp1	LAMP1	TRUE
Irf2	IRF2	TRUE
Dnmt3a	DNMT3A	TRUE
Cd44	CD44	TRUE
Agrn	AGRN	TRUE
Abcc4	ABCC4	TRUE
Erbb2 Regulated Genes	Gene/Probe ID	GOBO matched
Wbp5	WBP5	TRUE
Tpd52l1	TPD52L1	TRUE
Stk17b	STK17B	TRUE
Stat3	STAT3	TRUE
Ptrf	PTRF	TRUE
Ppp2r5a	PPP2R5A	TRUE
Pfkfb3	PFKFB3	TRUE
Pbx1	PBX1	TRUE
Myo10	MYO10	TRUE
Mgat5	MGAT5	TRUE
Ltbp2	LTBP2	TRUE
Litaf	LITAF	TRUE
Lamp1	LAMP1	TRUE
Lamc2	LAMC2	TRUE
Jam2	JAM2	TRUE
Ikbkb	IKBKB	TRUE
Ehf	EHF	TRUE
Egfr	EGFR	TRUE
Derl1	DERL1	TRUE
Ctsb	CTSB	TRUE
Adam12	ADAM12	TRUE
Tgfb1 Regulated Genes	Gene/Probe ID	GOBO matched
Vdac2	VDAC2	TRUE
Txnip	TXNIP	TRUE
Tnfrsf10b	TNFRSF10A	FALSE
Tmod3	TMOD3	TRUE
Tgfb2	TGFB2	TRUE
Stat3	STAT3	TRUE
Smurf1	SMURF1	TRUE
Slc7a1	SLC7A1	TRUE
Slc39a14	SLC39A14	TRUE
Slc23a2	SLC23A2	TRUE
Ppp2r5a	PPP2R5A	TRUE
Pbx1	PBX1	TRUE
Ovol1	OVOL1	TRUE
Nmnat2	NMNAT2	TRUE
Nab1	NAB1	TRUE
Myo10	MYO10	TRUE
Mmp2	MMP2	TRUE
Mgat5	MGAT5	TRUE
Ltbp2	LTBP2	TRUE
Litaf	LITAF	TRUE
Lamc2	LAMC2	TRUE
Klf9	KLF9	TRUE
Itgb6	ITGB6	TRUE
Itga1	ITGA1	FALSE
Grhl2	GRHL2	TRUE
Foxc1	FOXC1	TRUE
Esrp1	ESRP1	TRUE
Elmo1	ELMO1	TRUE
Dnmt3a	DNMT3A	TRUE
Ctsc	CTSC	TRUE
Ctsb	CTSB	TRUE
Crb3	CRB3	FALSE
Cd44	CD44	TRUE
Arf4	ARF4	TRUE
App	APP	TRUE
Adam12	ADAM12	TRUE
Acsl3	ACSL3	TRUE
Acpp	ACPP	TRUE
